# Supplementary material for: Systemic administration of orexin A ameliorates established experimental autoimmune encephalomyelitis by diminishing neuroinflammation
Source: PubMed Central journal article supplement (PMC6425555; doi:10.1186/s12974-019-1447-y), 2019-03-20
Supplement: 12974_2019_1447_MOESM1_ESM.pdf [file 12974_2019_1447_MOESM1_ESM.pdf]

## Supplementary Table 1

| Gene                     | GenBank Accession Number | Primer sequence               |                               |
|--------------------------|--------------------------|-------------------------------|-------------------------------|
|                          |                          | Sense                         | Antisense                     |
| <b>Target Gene</b>       |                          |                               |                               |
| <b>Foxp3</b>             | NM_054039                | 5'-GTATTGAGGGTGGGTGTCAGG-3'   | 5'-GTCAGAGGCAGGCTGGATAAC-3'   |
| <b>Hcrtr1</b>            | NM_198959                | 5'-GAGCACTGGGCAGATGAACTCT-3'  | 5'-TGCGGAAGATCTGGAAATAGGC-3'  |
| <b>Hcrtr2</b>            | NM_198962                | 5'-GGTTCATCATCGCCAAGGAGAC-3'  | 5'-TGAGTCGGGTATCCTCATCATAG-3' |
| <b>Ifng</b>              | NM_008337                | 5'-GCAACAGCAAGGCGAAAAAG-3'    | 5'-ATCTCTTCCCCACCCCGAAT-3'    |
| <b>Il4</b>               | NM_021283                | 5'-CGAGGTCACAGGAGAAGGGA-3'    | 5'-AAGCCCTACAGACGAGCTCACT-3'  |
| <b>Il10</b>              | NM_010548                | 5'-GGTTGCCAAGCCTTATCGGA-3'    | 5'-ACCTGCTCCACTGCCTTGCT-3'    |
| <b>Il17a</b>             | NM_010552                | 5'-GGAGAGCTTCATCTGTGTCTCTG-3' | 5'-TTGGCCTCAGTGTTTGGACA-3'    |
| <b>Ip-10</b>             | NM_021274                | 5'-TGCTGGGTCTGAGTGGGACT-3'    | 5'-CCCTATGGCCCTCATTCTCAC-3'   |
| <b>Mcp-1</b>             | NM_011333                | 5'-AAAAACCTGGATCGGAACCAA-3'   | 5'-CGGGTCAACTTCACATTCAAAG-3'  |
| <b>Tgfb1</b>             | NM_011577                | 5'-TGCGCTTGCAGAGATTAATA-3'    | 5'-AGCCCTGTATTCCGTCTCCT-3'    |
| <b>Tnfa</b>              | NM_013693                | 5'-GGTGCCTATGTCTCAGCCTCTT-3'  | 5'-CGATCACCCCGAAGTTCAGTA-3'   |
| <b>Housekeeping Gene</b> |                          |                               |                               |
| <b>Hprt</b>              | NM_013556                | 5'-TGGTGAAAAGGACCTCTCGAA-3'   | 5'-TCAAGGGCATATCCAACAACA-3'   |
