# Supplementary material for: Systemic administration of orexin A ameliorates established experimental autoimmune encephalomyelitis by diminishing neuroinflammation
Source: PubMed Central journal article supplement (PMC6425555; doi:10.1186/s12974-019-1447-y), 2019-03-20

## Supplementary Figure 3

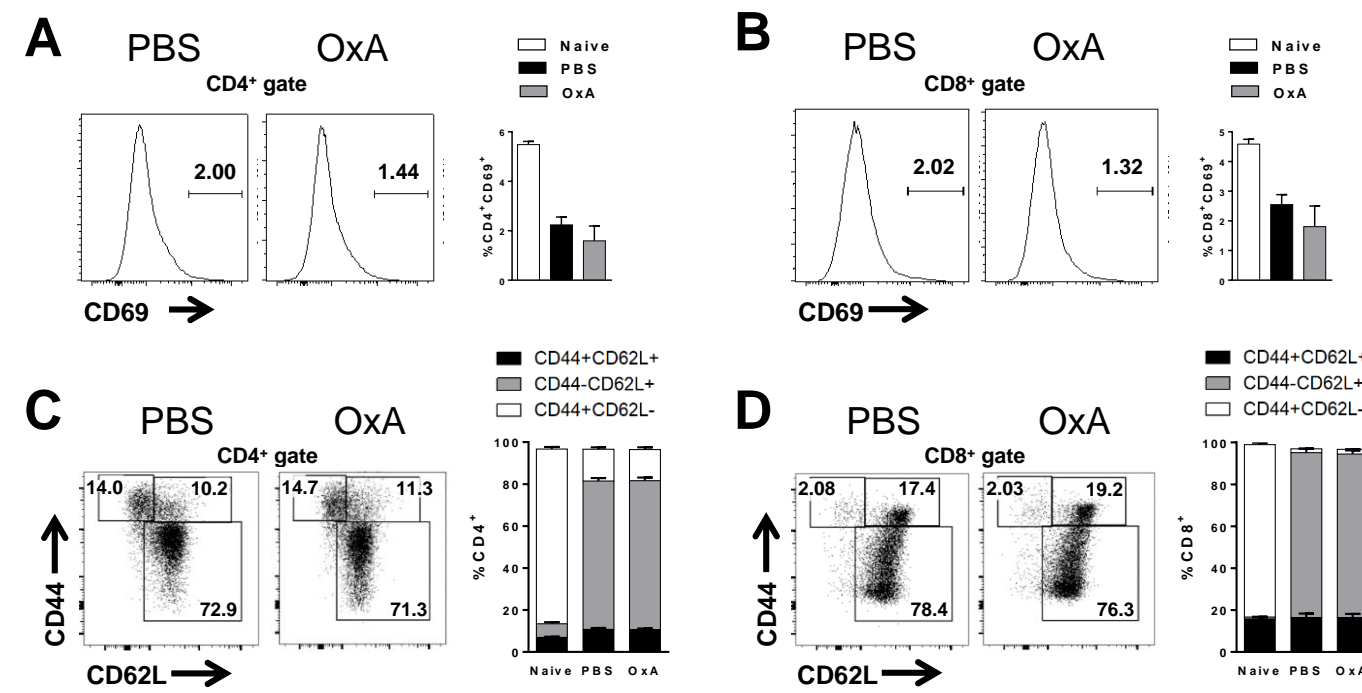

Supplement: 12974_2019_1447_MOESM4_ESM.pdf [file 12974_2019_1447_MOESM4_ESM.pdf]
